# Supplementary material for: The Relationship between Dietary Fat Intake and Depression: A Cross-sectional Study from NHANES 2007–2018
Source: Research Square preprint supplement (doi:10.21203/rs.3.rs-2555874/v1), 2023-02-24
Supplement: Supplementary file 1 [file 248ac133631950356a3c01bb.docx]

**Supplemental materials**

***Tab. S1 Statistics in the curve of fat-depression (F-D) formula***

| **items** | **Statistics** |
| --- | --- |
| **Number of Points** | 20 |
| **Degrees of Freedom** | 17 |
| ***Reduced Chi-Sqr** | 12.13582 |
| **Residual Sum of Squares** | 206.30887 |
| **R-Square (COD)** | 0.75812 |
| **Adj. R-Square** | 0.72967 |

*A total of 20 data were selected for formula fitting,* *data for PHQ9=20,21,26 were removed because the bias was too large or the sample data was too small. The model was from nonlinear curve fitting – ExpDec1 Function that is a one-phase exponential decay function with a constant parameter.*

*The fit converges when the number of iterations reaches 324. The chi-Sqr tolerance value of 1E-9 was reached.*

**Standard Error was scaled with the square root of reduced Chi-Sqr.*

***Tab. S2*** ***Statistics*** ***of fat-depression (F-D) formula***

| **Parameters** | **Value** | **Standard Error** | **t-Value** | **Prob>|t|** | **Dependency** |
| --- | --- | --- | --- | --- | --- |
| **y0** | 36.31684 | 16.26303 | 2.23309 | 0.03928 | 0.99771 |
| **A** | -0.33142 | 1.4211 | -0.23321 | 0.81838 | 0.99993 |
| **t** | -24.28642 | 20.44015 | -1.18817 | 0.2511 | 0.9999 |

*The fat-depression formula or F-D formula is*  ***,*** *y0=36.31684±16.26303, A=-0.33142±1.4211, t=-24.28642±20.44015.*

***Tab. S3 Analysis of Variance in Formula Fitting***

|  | **DF** | **Sum of Squares** | **Mean Square** | **F Value*** | ***Prob>F*** |
| --- | --- | --- | --- | --- | --- |
| **Regression** | 2 | 646.64113 | 323.32057 | 26.64185 | 5.76171E-6 |
| **Residual** | 17 | 206.30887 | 12.13582 |  |  |
| **Uncorrected Total** | 20 | 5383 |  |  |  |
| **Corrected Total** | 19 | 852.95 |  |  |  |

*ANOVA was used for the curve superiority test. *F value=26.64185, p<0.05, It can be considered that there is a curvilinear relationship between fat intake and PHQ9, and this curvilinear relationship holds.*

***Tab. S4 Basic Characteristics of Study Participants in Each Cohort***

|  | **Development Cohort**  **(n=2542)** | **Validation Cohort**  **(n=849)** | ***P-value**** |
| --- | --- | --- | --- |
| **Age(year)** |  |  | 0.222 |
| ≤39 | 699 (27.498%) | 234 (27.562%) |  |
| >39, ≤65 | 1231 (48.426%) | 434 (51.119%) |  |
| >65 | 612 (24.076%) | 181 (21.319%) |  |
| **BMI (body mass index) (kg/m²)** |  |  | 0.141 |
| <18.5 | 54 (2.124%) | 15 (1.767%) |  |
| ≥18.5, <25 | 661 (26.003%) | 192 (22.615%) |  |
| ≥25, <30 | 647 (25.452%) | 214 (25.206%) |  |
| ≥30 | 1180 (46.420%) | 428 (50.412%) |  |
| **Sex** |  |  | 0.787 |
| Man | 758 (29.819%) | 249 (29.329%) |  |
| Female | 1784 (70.181%) | 600 (70.671%) |  |
| **Ethnicity** |  |  | 0.278 |
| Mexican American | 390 (15.342%) | 124 (14.605%) |  |
| Non-Hispanic Black | 504 (19.827%) | 193 (22.733%) |  |
| Non-Hispanic White | 1076 (42.329%) | 364 (42.874%) |  |
| Other Hispanic | 343 (13.493%) | 99 (11.661%) |  |
| Other race | 229 (9.009%) | 69 (8.127%) |  |
| **Marital** |  |  | 0.506 |
| Single | 1297 (51.023%) | 422 (49.706%) |  |
| No single | 1245 (48.977%) | 427 (50.294%) |  |
| **Family income** |  |  | 0.158 |
| Under $20,000 | 1118 (43.981%) | 397 (46.761%) |  |
| $20,000 and over | 1424 (56.019%) | 452 (53.239%) |  |
| **Education level** |  |  | 0.484 |
| Under high school | 324 (12.746%) | 113 (13.310%) |  |
| High school | 1102 (43.352%) | 348 (40.989%) |  |
| More than high school | 1116 (43.902%) | 388 (45.701%) |  |
| **Diabetes** |  |  | 0.494 |
| No | 1687 (66.365%) | 545 (64.193%) |  |
| Diabetes risk | 212 (8.340%) | 73 (8.598%) |  |
| Yes | 643 (25.295%) | 231 (27.208%) |  |
| **Hypertension** |  |  | 0.520 |
| No | 1254 (49.331%) | 408 (48.057%) |  |
| Yes | 1288 (50.669%) | 441 (51.943%) |  |
| **Alcohol using** |  |  | 0.960 |
| No | 972 (38.238%) | 319 (37.574%) |  |
| Mild | 658 (25.885%) | 227 (26.737%) |  |
| Moderate | 424 (16.680%) | 143 (16.843%) |  |
| Heavy | 488 (19.197%) | 160 (18.846%) |  |
| **Smoke** |  |  | 0.670 |
| Never | 713 (28.049%) | 250 (29.446%) |  |
| Now | 593 (23.328%) | 200 (23.557%) |  |
| Former | 1236 (48.623%) | 399 (46.996%) |  |
| **Fat intake**  **(g/2 days)** |  |  | 0.834 |
| <65 | 339 (13.336%) | 110 (12.956%) |  |
| ≥65, <100 | 790 (31.078%) | 257 (30.271%) |  |
| ≥100, <155.45 | 1413 (55.586%) | 482 (56.773%) |  |

* P-value obtained by t-test or chi-square test. Use the Kruskal-Wallis rank-sum test for continuous variables, and if the count variable has a theoretical number <10, use Fisher's exact probability test.

***Tab. S5 (a) Scale Coefficients Based on Development Cohort (unadjusted)***

|  | **Coefficient** | **95%CI** | **95%CI** | ***P-value1*** |
| --- | --- | --- | --- | --- |
| **(Intercept)** | 12.47576 | 11.05461 | 13.89030 | **<0.05** |
| **Age** | -0.59203 | -0.87924 | -0.31310 | **<0.05** |
| **BMI** | 0.31657 | 0.12214 | 0.53583 | **<0.05** |
| **Sex** | 0.38299 | -0.03863 | 0.76901 | 0.06 |
| **Ethnicity** | 0.12132 | -0.04039 | 0.28132 | 0.10+ |
| **Marital** | -0.47210 | -0.82491 | -0.09511 | **<0.05** |
| **Family income** | -0.55353 | -0.90180 | -0.15790 | **<0.05** |
| **Educational level** | -0.45639 | -0.72610 | -0.20165 | **<0.05** |
| **Diabetes** | 0.22864 | -0.00640 | 0.47390 | 0.06 |
| **Hypertension** | 0.34172 | -0.05779 | 0.75819 | 0.07 |
| **Alcohol using** | 0.04915 | -0.13469 | 0.22630 | 0.32+ |
| **Smoke** | -0.76105 | -0.97750 | -0.53151 | **<0.05** |
| **Fat intake** | -0.29182 | -0.55217 | -0.01354 | **<0.05** |

***Tab. S5 (b) Scale Coefficients Based on Development Cohort (adjusted)***

|  | **Coefficient** | **95%CI** | **95%CI** | ***P-value*** |
| --- | --- | --- | --- | --- |
| **(Intercept)** | 12.89412 | 11.55488 | 14.21288 | **<0.05** |
| **Age** | -0.61467 | -0.88508 | -0.31310 | **<0.05** |
| **BMI** | 0.30505 | 0.10980 | 0.52631 | **<0.05** |
| **Sex** | 0.36946 | -0.05124 | 0.75941 | 0.06 |
| **Marital** | -0.46377 | -0.81610 | -0.09027 | **<0.05** |
| **Family income** | -0.55618 | -0.90572 | -0.16033 | **<0.05** |
| **Educational level** | -0.41419 | -0.67177 | -0.15951 | **<0.05** |
| **Diabetes** | 0.22266 | -0.01098 | 0.46599 | 0.06 |
| **Hypertension** | 0.34279 | -0.06330 | 0.76623 | 0.07 |
| **Smoke** | -0.77760 | -0.99632 | -0.54483 | **<0.05** |
| **Fat intake** | -0.28533 | -0.54497 | -0.00812 | **<0.05** |

*1, the P-value and confidence intervals were calculated by Bootstrap results (N resampling: 1000).*

*+, All variables with p-values≥0.1(Ethnicity and Alcohol using) will be excluded from the adjusted model.*

*CI, confidence intervals.*

***Tab. S6(a)*** ***The Real PHQ9 and*** ***Scale-value*** ***for the Test of Variance*** *(****t-test) in Development*** ***Cohort***

|  | **t-Statistic** | **DF** | **Prob>|t|** |
| --- | --- | --- | --- |
| **Equal Variance Assumed** | 1.27733 | 598 | 0.20198 |
| **Equal Variance NOT Assumed**  **(Welch Correction)** | 1.27733 | 330.25993 | 0.20238 |

*The chi-square test was performed on the selected data before conducting the t-test, and the results showed significant differences between the two data groups (p<0.05).* *A t-test can be performed among two groups.*

*Assuming H0:* *There is NO significant difference between The Real PHQ9 and Scale-value in Development Cohort.*

*H1:* *There is a significant difference between The Real PHQ9 and Scale-value in Development Cohort.*

*According to the result of the t-test, it cannot reject H0.*

***Tab. S6(b) The Real PHQ9 and Scale-value*** ***for the Test of Variance*** *(****t-test) in validation Cohort***

|  | ***t-Statistic*** | ***DF*** | ***Prob>|t|*** |
| --- | --- | --- | --- |
| ***Equal Variance Assumed*** | 0.7772 | 196 | 0.43798 |
| ***Equal Variance NOT Assumed***  ***(Welch Correction)*** | 0.7772 | 109.02354 | 0.43873 |

*Assuming H0:* *There is NO significant difference between The Real PHQ9 and Scale-value* *in validation Cohort.*

*H1:* *There is a significant difference between The Real PHQ9 and Scale-value* *in validation Cohort.*

*According to the result of the t-test, it cannot reject H0.*
